# Supplementary material for: Assessment of the Greenland ice sheet – atmosphere feedbacks forthe next century with a regional atmospheric model fully coupled toan ice sheet model
Source: Copernicus journal article supplement (doi:10.5194/tc-2017-230), 2017-11-06
Supplement: Supplementary file 1 [file tc-2017-230-supplement.pdf]

# Supplementary material: Assessment of the Greenland ice sheet - atmosphere feedbacks for the next century with a regional atmospheric model fully coupled to an ice sheet model

Sebastien Le clec'h et al. (2017)

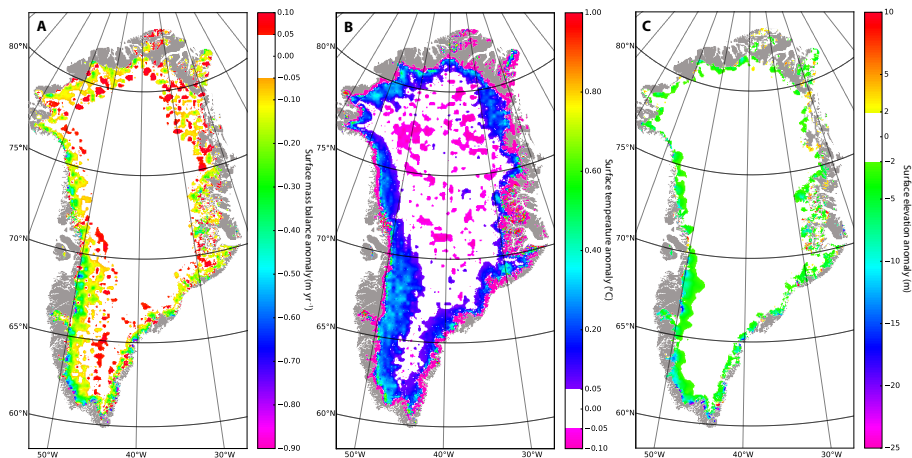

**Figure S1.** Mean anomalies between 2095-2100 of the 2-W experiments and the same years of the NC experiments: (a) Surface mass balance anomalies in  $\text{Gt yr}^{-1}$ ; (b) Surface temperature anomalies in  $^{\circ}\text{C}$ ; (c) Surface elevation anomalies in m.

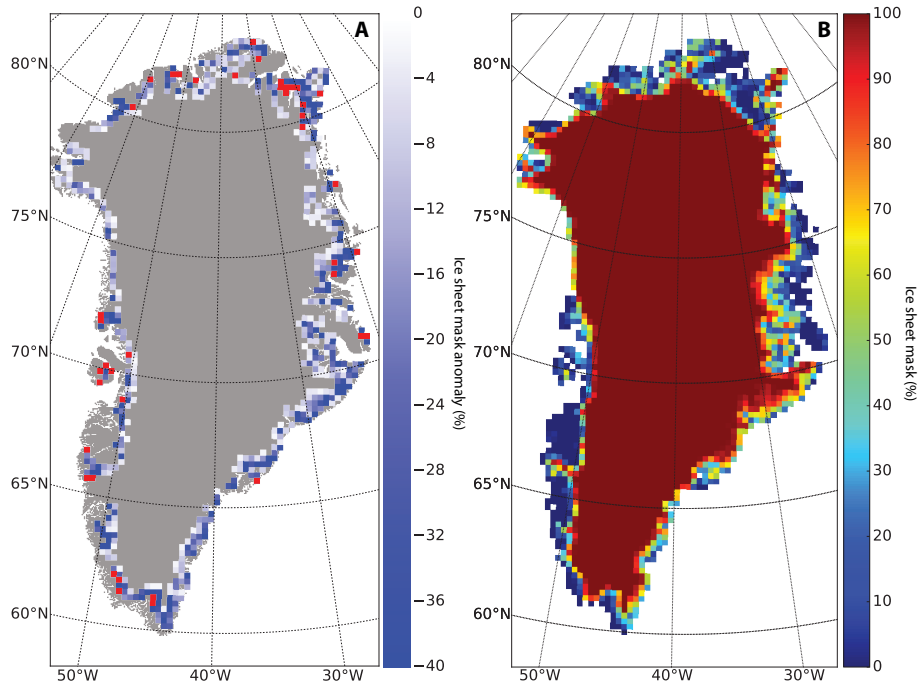

**Figure S2.** (a) Ice sheet mask anomalies (in %) between the last five years (2145-2150) of the 2-W experiment and ice sheet mask of the NC experiment seen by MAR. Red colors indicate pixels losing 100 % of the ice sheet coverage. (a) Mean ice sheet mask over the last five years (2145-2150) of the 2-W experiments. Values represent % of the grid cell covered by ice.
